# Supplementary material for: Evidence Supporting an Antimicrobial Origin of Targeting Peptides to Endosymbiotic Organelles
Source: PubMed Central journal article supplement (PMC7463930; doi:10.3390/cells9081795), 2020-07-28
Supplement: cells-09-01795-s001.pdf [file cells-09-01795-s001.pdf]

# Evidence supporting an antimicrobial origin of targeting peptides to endosymbiotic organelles

Clotilde Garrido<sup>1†</sup>, Oliver D. Caspari<sup>1†</sup>, Yves Choquet<sup>1</sup>, Francis-André Wollman<sup>1</sup>, Ingrid Lafontaine<sup>1\*</sup>

## Supplementary Text

### Diversity of HA-RAMPs

Rather than reflecting structural relationships between peptides, AMP families have often been named after the source of novel peptides or a defining characteristic. For example, gaegurins, named after the Korean word “Gaegury” for frog, regroup AMPs isolated from the Korean frog *Glandirana emeljanovi* (formerly *Rana rugosa*) even though they are closer in sequence to other HA-RAMP families than to each other [1]. Unsurprisingly, gaegurins are spread across both HA-RAMP classes (Figure 1C). However, not all idiosyncratically named families lack structural systematics. As more and more AMPs were being characterised, investigators started to class novel peptides that were deemed related in primary sequence in families named after the first described peptide of that type. Cecropins, named after the giant silk moth *Hyalopphora cecropia* from which the first members were extracted, are now a well-established family including sarcotoxin or bactericidin peptides. They form a relatively uniform group to the right of the NJ clustering tree (Supplementary Figure 2). Conversely, brevinin-1 and brevinin-2 carry the same name because they were originally isolated together from the Japanese frog *Pelohylax porosus* (formerly *Rana brevidopda porsa*), but are now two separate families, each expanded by addition of homologous peptides [2]. The brevinin-1 family forms a fairly homogeneous branch towards the bottom of the clustering tree (lower left side on Supplementary Figure 2), interspersed only by some gaegurin and ranatuerin peptides that had already been recognised as brevinin-1 homologues [1,2]. Brevinin-2, by contrast, is split into three relatively distinct subgroups in our analysis. It is interesting to note that brevinin, esculentin and ranatuerin families all containing the “Rana box” span both class I and class II HA-RAMPs (Figure 2C). The “Rana box” is a C-terminal disulphide bridge motif shared among ranid AMPs [3] that suggests a common origin and shows that related HA-RAMPs diversify rapidly in terms of physico-chemical properties.

1. Won, H.S.; Kang, S.J.; Lee, B.J. Action mechanism and structural requirements of the antimicrobial peptides, gaegurins. *Biochim. Et Biophys. Acta-Biomembr.* **2009**, *1788*, 1620–1629, doi:10.1016/j.bbamem.2008.10.021.
2. Conlon, J.M. Reflections on a systematic nomenclature for antimicrobial peptides from the skins of frogs of the family Ranidae. *Peptides* **2008**, *29*, 1815–1819, doi:10.1016/j.peptides.2008.05.029.
3. Haney, E.F.; Hunter, H.N.; Matsuzaki, K.; Vogel, H.J. Solution NMR studies of amphibian antimicrobial peptides: linking structure to function? *Biochim. Biophys. Acta* **2009**, *1788*, 1639–1655, doi:10.1016/j.bbamem.2009.01.002.

35 Supplementary Figures

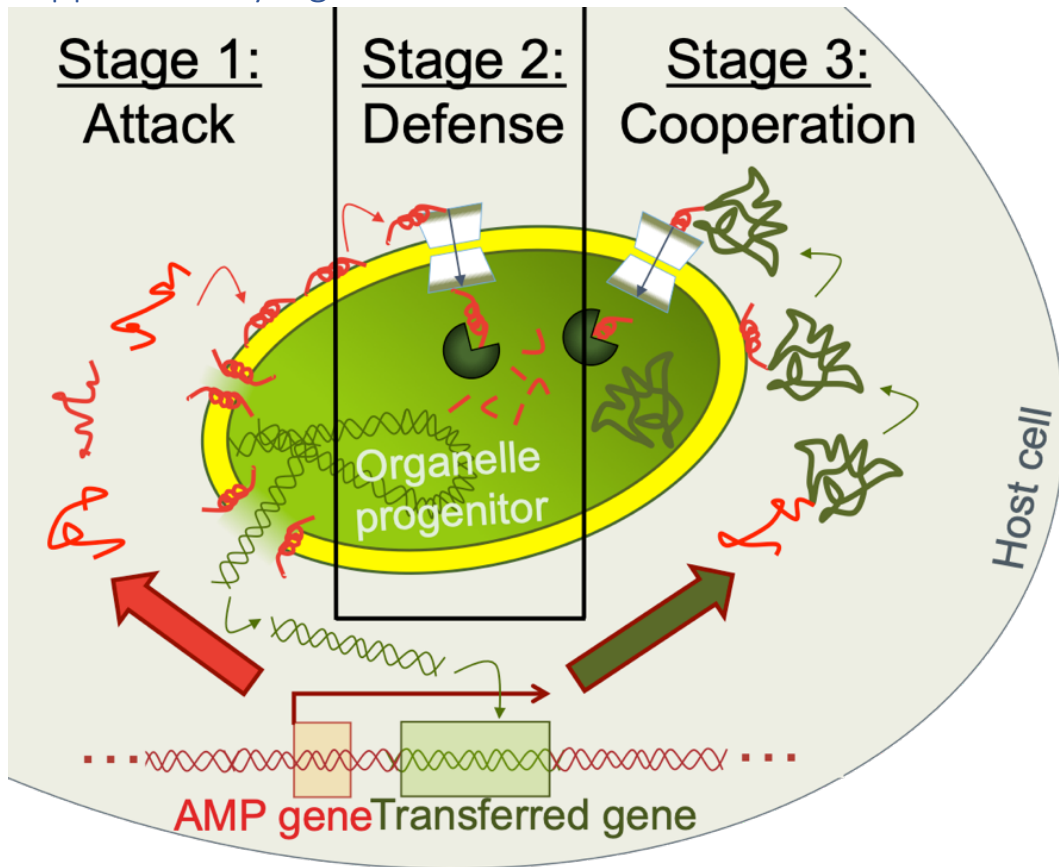

36  
 37 **Supplementary Figure 1. Emergence of TPs from AMPs implies a three-stage scenario for the evolution**  
 38 **of endosymbiotic protein targeting systems.** In stage 1, the host attacks the proto-endosymbiont using  
 39 ribosomally synthesised AMPs. Cell lysis releases genetic material, which may occasionally be integrated  
 40 into the host genome. In stage 2, the proto-endosymbiont acquires an import-and-destroy mechanism to  
 41 resist host attacks, comprising a dedicated AMP transporter and a cytosolic peptidase. In stage 3, this  
 42 detoxification mechanism is co-opted to import any protein that results from serendipitous fusion of genes  
 43 downstream of AMP coding sequences.

44  
 45  
 46  
 47

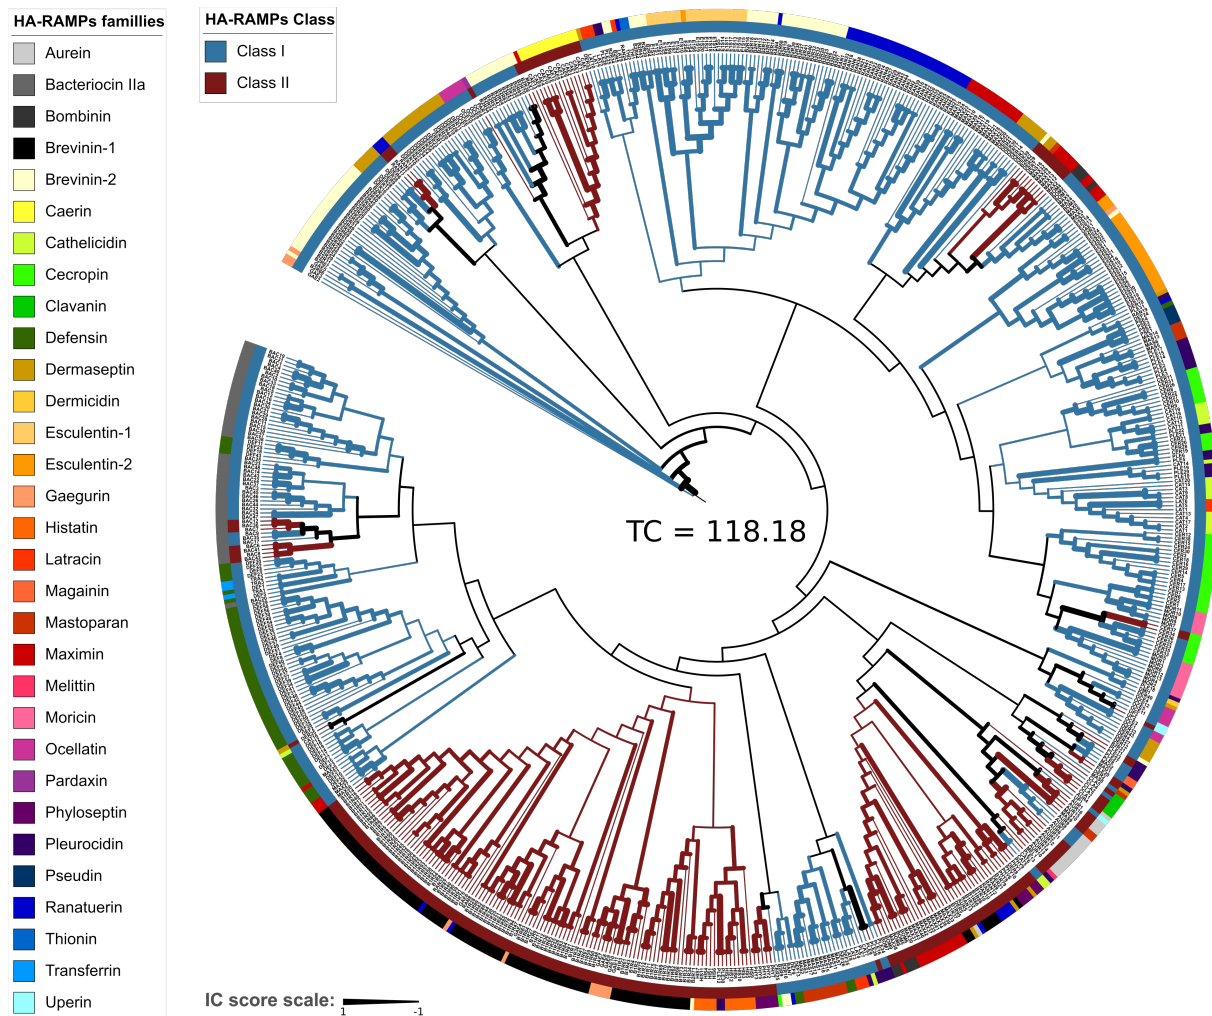

48  
 49 **Supplementary Figure 2. HA-RAMPs families and classes are spread all over the tree.** Neighbour-joining  
 50 tree based on Euclidean distances of HA-RAMPs described by 36 ACC terms. The branches are coloured  
 51 according to HA-RAMP classes I (blue) and II (red), as defined by the k-means clustering (Figure 1). Branch  
 52 widths are proportional to the Internode Certainty (IC) value, indicating the robustness of the tree (see  
 53 Methods). IC values at or close to  $-1$  (thin branches) indicate an almost complete absence of support for the  
 54 bipartition defined by the branch among bootstrap trees and IC values close to 1 (thick branches) indicate  
 55 the absence of conflict among the bootstrap trees [52]. The sum of IC values for all branches (Tree certainty,  
 56 TC) is given at the centre of the tree. When all children of a node have the same colour, the colour propagates  
 57 inwards towards the root. The inner circle around the NJ tree indicates the HA-RAMP class of the peptide.  
 58 The outer circle indicates the family of the peptide, as described in the literature. See figure box for colour  
 59 code. Class I HA-RAMPs are found in different parts of the NJ clustering tree, sometimes together with  
 60 some class II HA-RAMPs (in red), but the two classes are not intermingled and tend to form robust  
 61 homogeneous sub-trees.

62

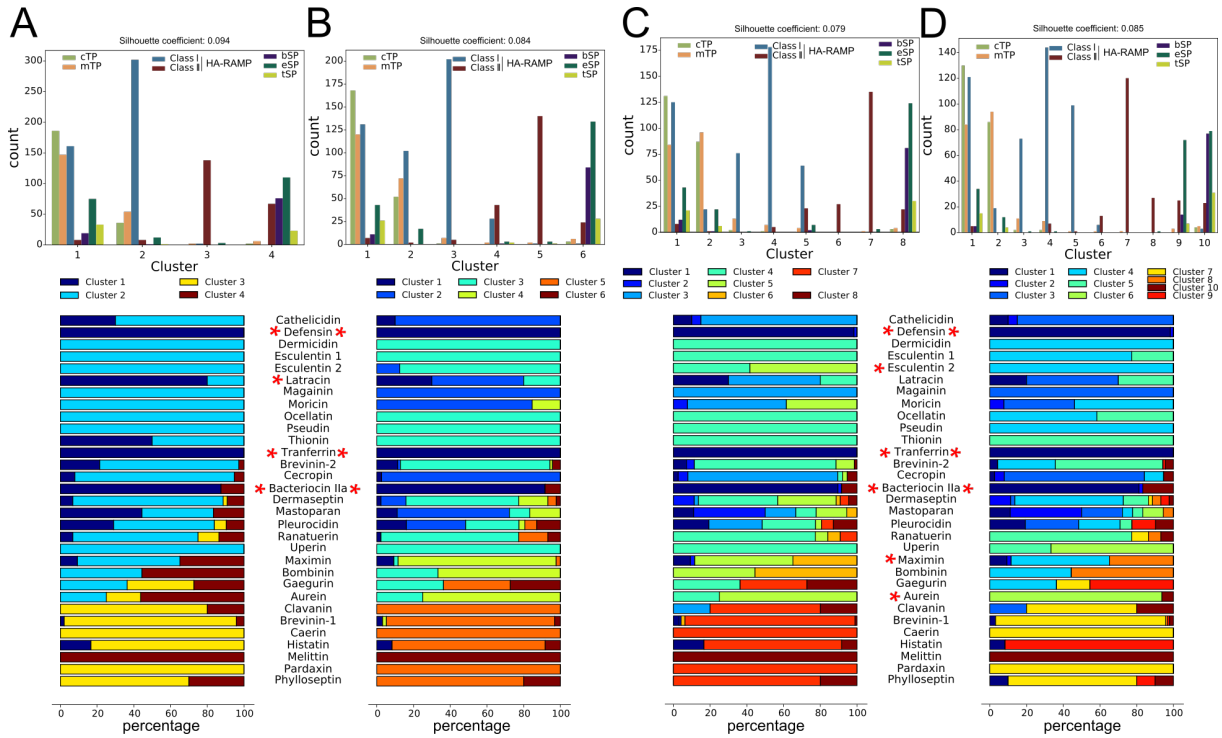

63

64 **Supplementary Figure 3. TPs cluster with class I HA-RAMPs.** K-means clustering of peptides, as  
 65 described by their 36 ACC terms, with cTP (green), mTP (orange), class I HA-RAMP (blue), class II HA-  
 66 RAMP (dark red), bSP (dark green) and tSP (light green) ( $\chi^2$  Pearson test,  $p < 4.94 \cdot 10^{-324}$ ). From (A) to  
 67 (D), k-means clustering with  $k=4, 6, 8$  and  $10$ . Top: The average silhouette coefficient is indicated on the top  
 68 of the cluster distribution. The cluster at the most left side contains a majority of TP and class I HA-RAMPs.  
 69 This cluster is robust and conserves about 60% of its peptides from  $k=3$  to  $k=10$ . Bottom: percentage of  
 70 peptides of HA-RAMP families described in the literature among the k-means clusters. Families that are  
 71 mainly found in the robust cluster (at the most left side in the first column) are indicated by a red star.  
 72 Among the different classifications (with  $k$  varying from 2 to 10), the number of tSP in the cluster grouping  
 73 the majority of eSPs and bSPs is always higher than in the cluster grouping class I HA-RAMPs and TPs,  
 74 except for clustering with  $k=4$ , revealing a robust association of all SPs.  
 75

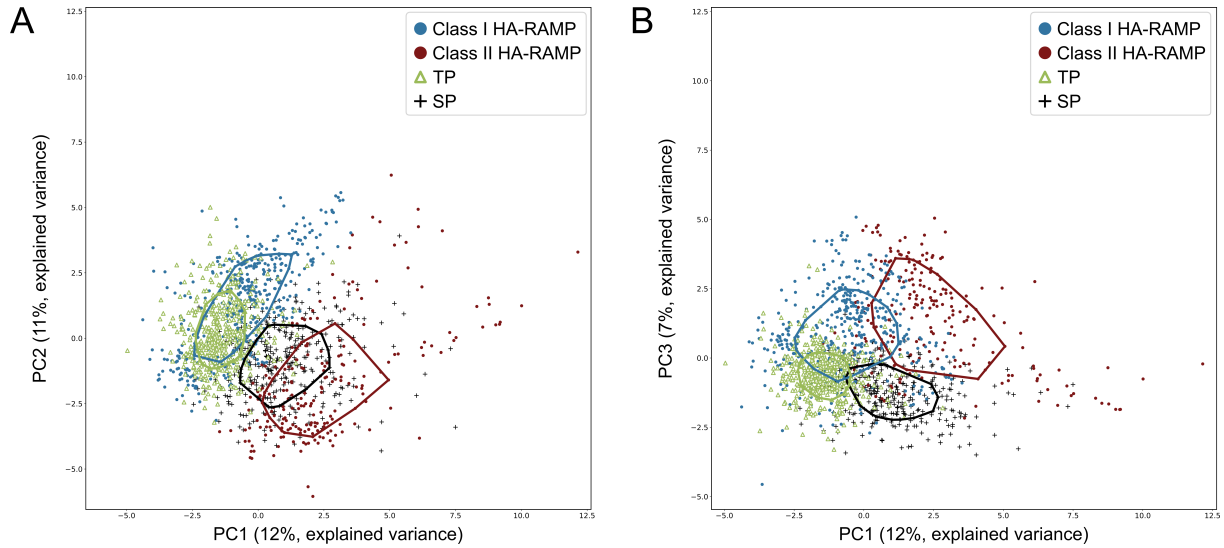

76  
 77 **Supplementary Figure 4. The third principal component of the PCA analysis confirms proximity**  
 78 **between class I HA-RAMPs and TPs, while improving the separation between class II HA-RAMPs and**  
 79 **SPs.** (A) PCA on normalised ACC terms for class I HA-RAMP (blue circle), class II HA-RAMP (dark red  
 80 circle), targeting peptides (green triangle) and signal peptides (black cross). Peptide positions are plotted  
 81 along the first (X) and second (Y) principal components. Note that the z1.lag1 ACC term reflecting the  
 82 hydrophobicity has the largest contribution in PC2 (Supplementary Figure 5C). (B) Same PCA as in (A)  
 83 with peptide positions plotted along the first (X) and third (Y) principal components. Note that z1.lag4  
 84 reflecting the amphiphilic character of the helix has the largest contribution in PC3 (Supplementary Figure  
 85 5C). Explained variance is indicated in parenthesis for each axis. Solid lines represent the convex areas of  
 86 the 50% most central peptides in each group. ACC term contribution in the principal components are given  
 87 in Supplementary Figure 5 C,D.

88  
 89

color code:

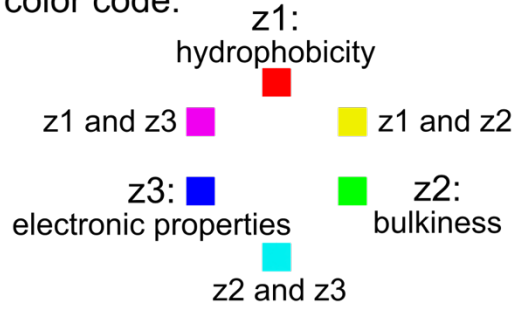

form code:

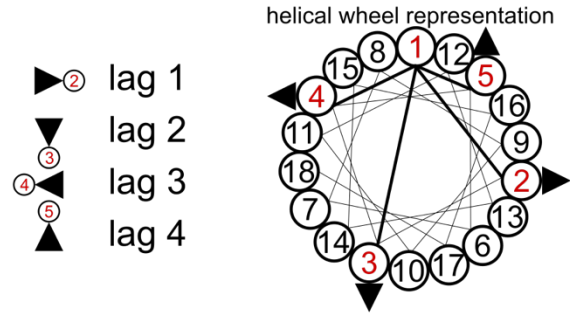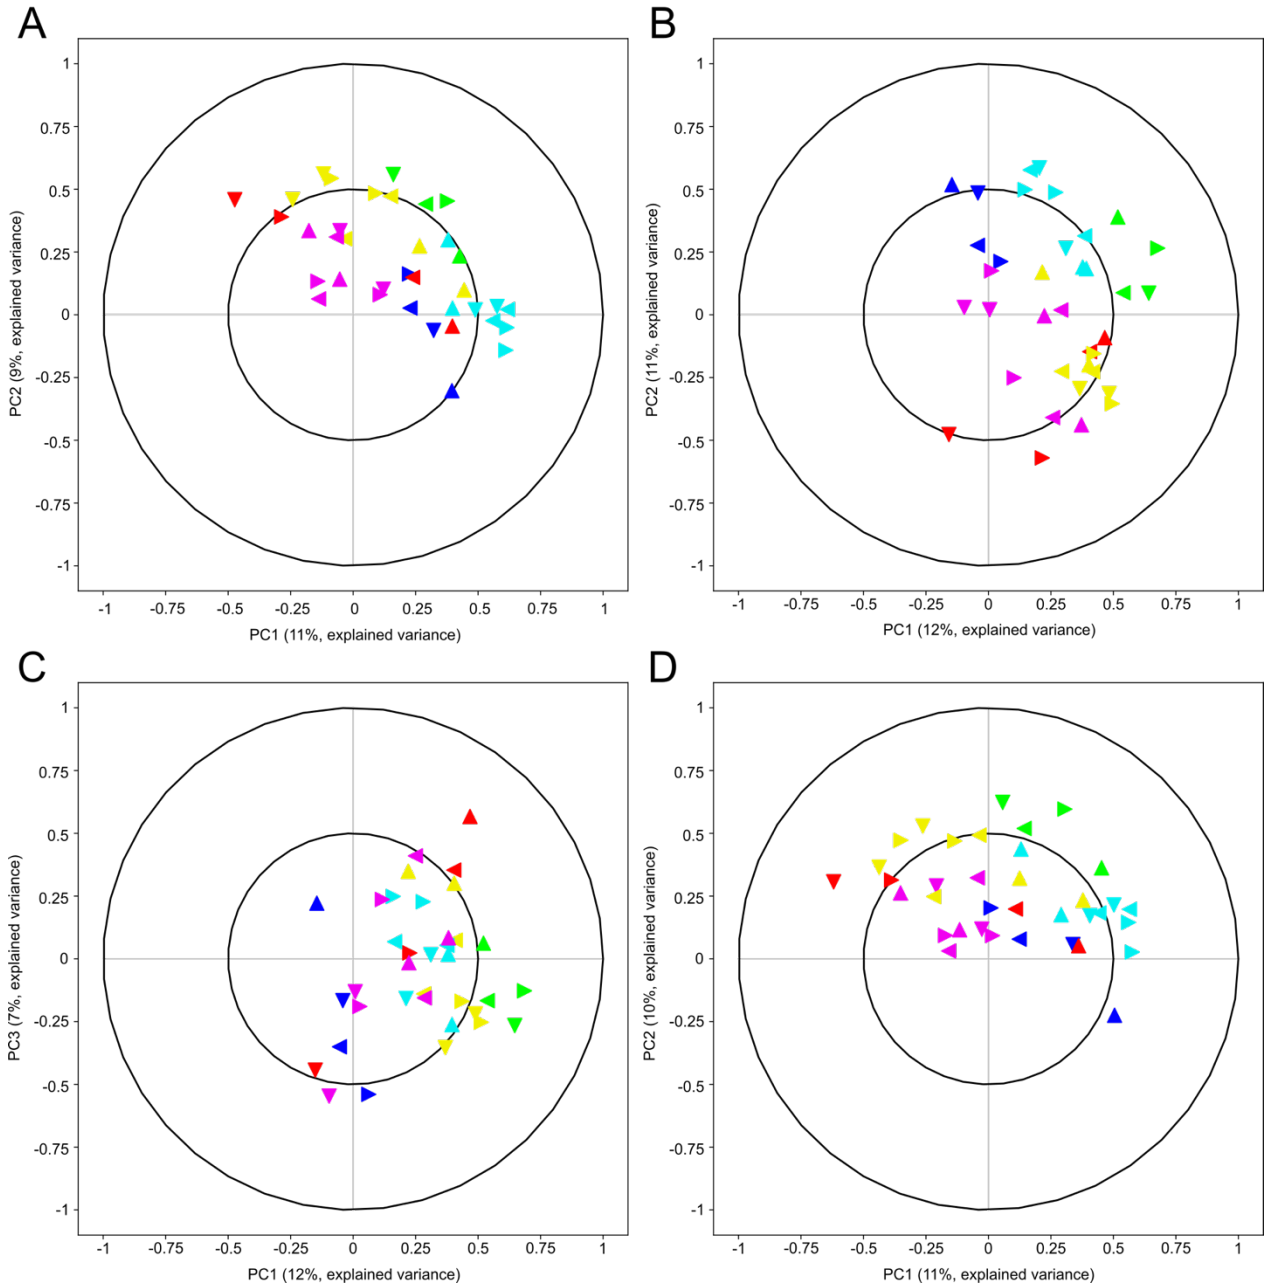

90

91

92

**Supplementary Figure 5. Separation of peptides in PCA analyses reflects hydrophobic and amphiphilic features.** (Top scheme) Each triangle represents an ACC term, where the colour corresponds to the z-scales

93 involved as described in the legend, and the orientation corresponds to the lag as indicated on the helical  
94 wheel representation: a lag of 1 thus describes the relation between residue 1 and residue 2; a lag of 2  
95 between residue 1 and residue 3 etc. The maximum considered is lag 4, thus only residues 1-5 are concerned.  
96 The red numbers in the circles next to the triangles indicate the residues considered relative to the first one,  
97 highlighted in red on the helical wheel representation. For a qualitative analysis of the physico-chemical  
98 significance of these two components, one has to keep in mind that an  $\alpha$ -helix being 3.6 amino acids per  
99 turn, the  $n+3$  and  $n+4$  residues (reflected by lag 3 and lag 4 terms) can be considered as lying on the same  
100 face of the  $\alpha$ -helix as residue  $n$ , whereas the  $n+1$  and  $n+2$  residues (reflected by a lag 1 and lag 2 terms)  
101 rather lie on the opposite face.

102 (A) Correlation circles for the PCA presented in Figure 4. The coupling between electronic and steric  
103 properties ( $z_{2.3}$  and  $z_{3.2}$ ) of the residues from the two faces of the amphiphilic helix (lag1 and lag3) are the  
104 main contributors to PC1 (largest distance from the origin along the x-axis) whereas the hydrophobic and  
105 steric properties- and their coupling- ( $z_1$ ,  $z_2$ ,  $z_{1.2}$  and  $z_{2.1}$ ) of the residues along the same face of the helix  
106 (lag1 and lag2) most contribute to PC2 (largest distance from the origin along the y-axis). Note that  $z_{1.lag2}$   
107 is the term with the highest distance from the radius of the circle and define a diameter line with  $z_{3.lag4}$ ,  
108 meaning that  $z_{3.lag4}$  and  $z_{1.lag2}$  are the most anti-correlated terms. (B) Correlation circles for the PCA  
109 presented in Supplementary Figure 4A. Note that the  $z_{1.lag1}$  term, reflecting the hydrophobicity on the  
110 opposite side of the helix has the largest contribution in PC2. (C) Correlation circles for the PCA presented  
111 in Supplementary Figure 4B. Note that  $z_{1.lag4}$  reflecting the hydrophobicity on the same side of the helix  
112 has the largest contribution in PC3. (D) Correlation circles for the PCA presented in Supplementary Figure  
113 8. X-axis and y-axis are principal components used for representation. Unit circle and half unit circles are  
114 represented.

115

116

117

118

119

120

121

122

123

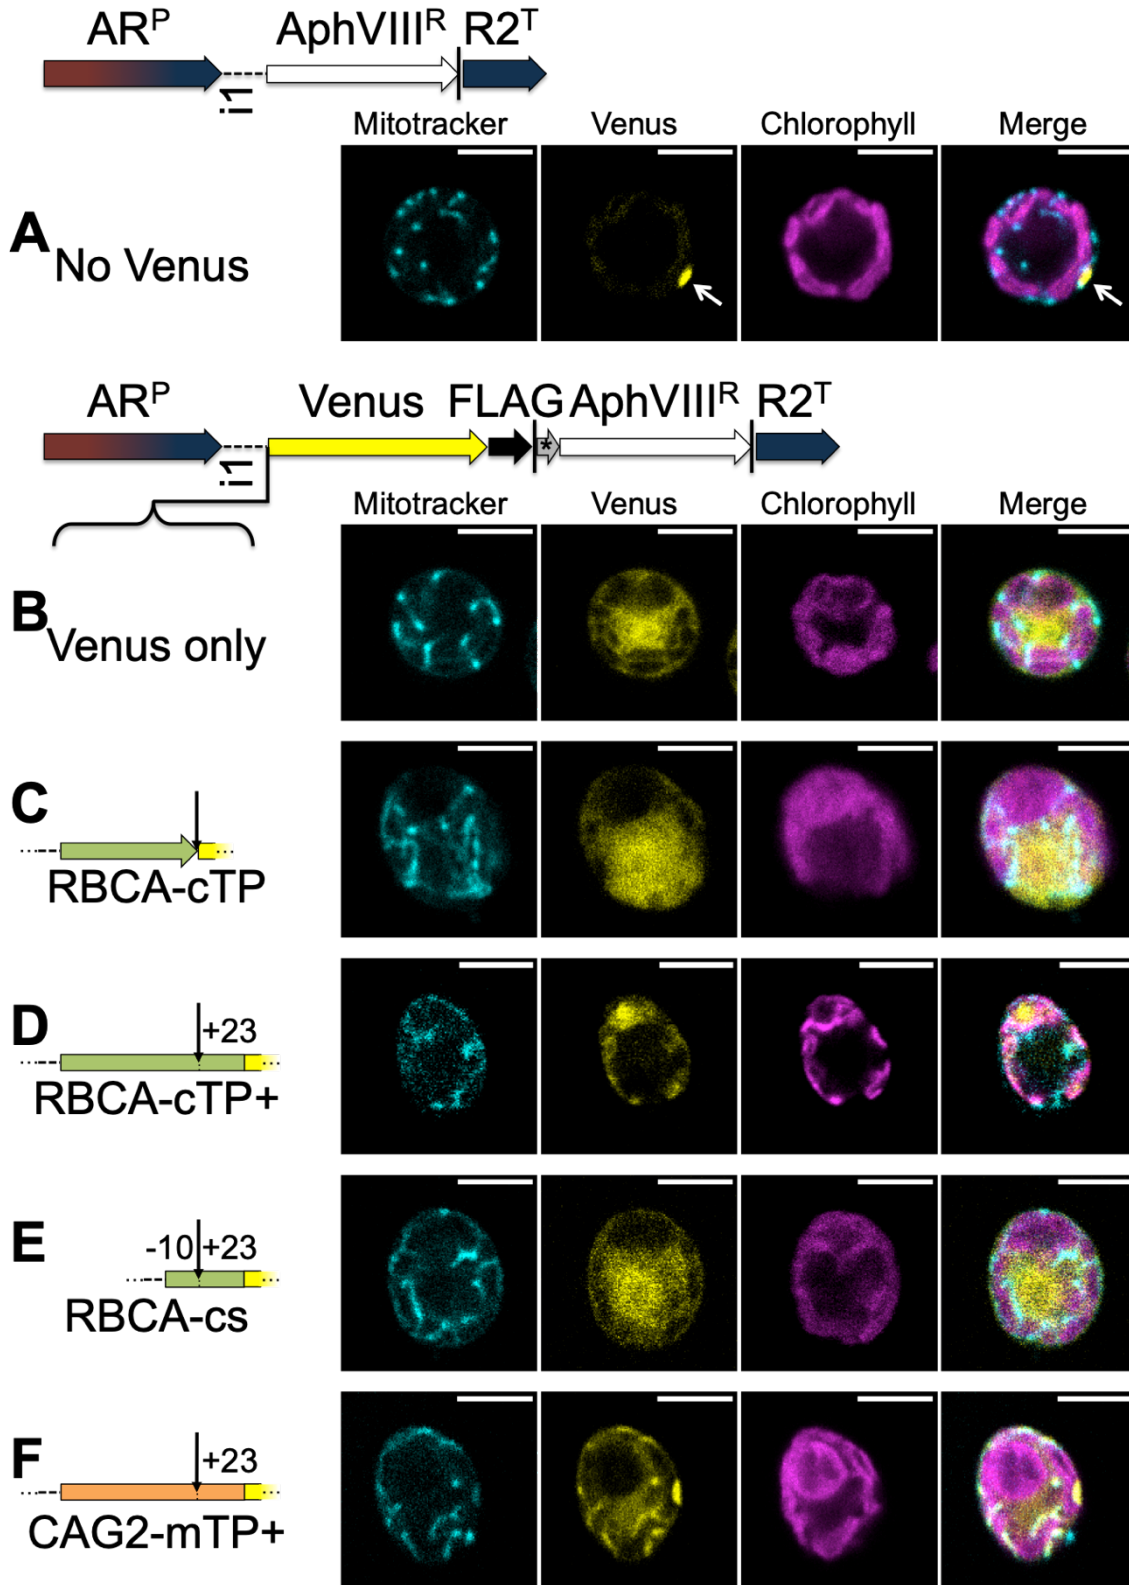

124  
 125 **Supplementary Figure 6. A RBCA cleavage site including downstream residues is necessary but not**  
 126 **sufficient for targeting.** False-colour confocal images of representative *C. reinhardtii* cells show  
 127 mitochondria as indicated by mitotracker fluorescence in cyan, the localisation of Venus in yellow and



128 chlorophyll autofluorescence in magenta. Scale bars are 5 $\mu$ m. Expression constructs use the chimeric HSP70-  
129 RBCS2 promotor (AR<sup>P</sup>), RBCS2 intron 1 (i1) in the RBCS2 5' UTR, the paromomycin resistance gene  
130 (AphVIII<sup>R</sup>) as selectable marker, and the RBCS2 terminator (R2<sup>T</sup>). Vertical lines represent stop codons. A  
131 Venus fluorescent reporter carrying a FLAG-tag at the C-terminus was introduced upstream of AphVIII<sup>R</sup>,  
132 and bicistronic expression ensured by connecting the two genes with a STOP-TAGCAT sequence (\*).  
133 Candidate peptides to be assayed for targeting were then introduced upstream of Venus. (A) shows cells  
134 expressing the selectable marker only (the white arrow marks the eyespot). (B) Venus fluorescence is shown  
135 in the absence of a presequence, (C) when fused to Rubisco activase (RBCA) cTP up to the cleavage site, (D)  
136 including 23 residues downstream of the cleavage site, (E) the RBCA cleavage site (RBCA-cs) fragment  
137 alone encompassing residues -10 to +23, (F) or fused to  $\gamma$ -carbonic anhydrase 2 (CAG2) mTP. In each case,  
138 the site of cleavage is indicated by a downward arrow. See Supplementary Figure 9 for a quantification of  
139 co-localisation, Supplementary Figure 10 for replicates, and Table S6 for a description of peptide sequences.

140

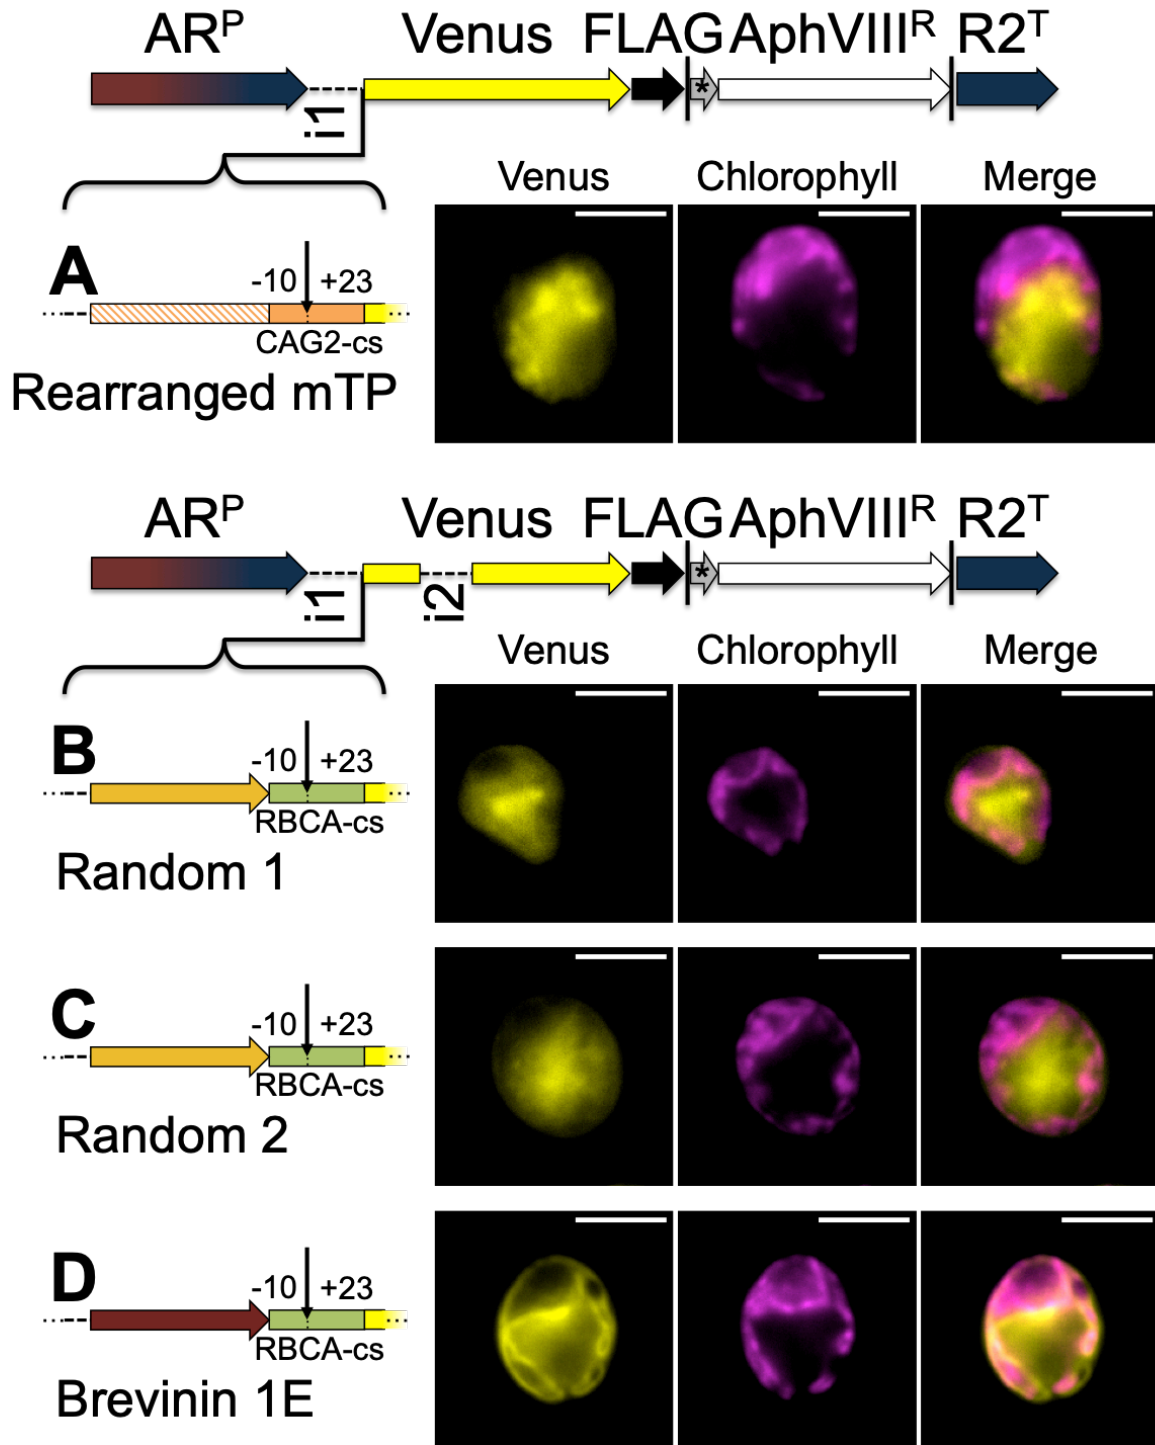

141  
 142 **Supplementary Figure 7. The presence of an amphiphilic helix is necessary but not sufficient for**  
 143 **targeting.** False-colour epifluorescence images of representative *C. reinhardtii* cells show the localisation of  
 144 Venus in yellow and chlorophyll autofluorescence in magenta. Scale bars are 5 $\mu$ m. See Supplementary  
 145 Figure 8 for a description of construct elements; i2 is RBCS2 intron 2. (A) shows Venus fused to the CAG2-  
 146 mTP, rearranged to be unable to form an amphipathic helix, and with residues (-10 to +23) encompassing  
 147 the cleavage site (CAG2-cs). Lower panels show Venus localisation driven by computationally generated

148 random peptides (B, C) or the class II HA-RAMP Brevinin 1E, each fused to RBCA-cs. See Supplementary  
 149 Figure 10 for replicates, and Table S6 for peptide sequences.

150

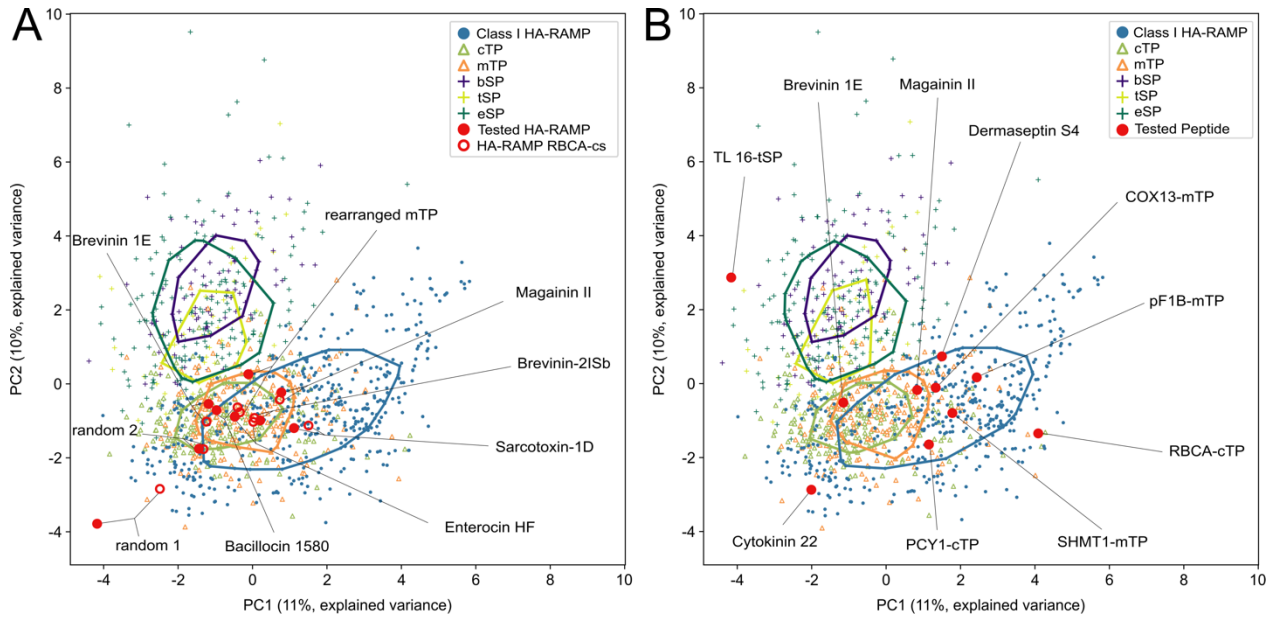

151

152 **Supplementary Figure 8. Position in PCA of class I HA-RAMPs and TPs selected for experimental**  
 153 **analysis.** Same principle as in Figure 4, considering TP, class I HA-RAMPs and SP. (A) HA-RAMPs used  
 154 for targeting assays are indicated (red dot: original, red circle: construct including the Rubisco activase cTP  
 155 cleavage site, RBCA-cs). (B) Peptides used for antimicrobial assays are indicated in red. See Supplementary  
 156 Figure 5 for the contribution of ACC terms to the principal components PC1, PC2 and PC3 and Table S6  
 157 and S7 for peptide sequences.

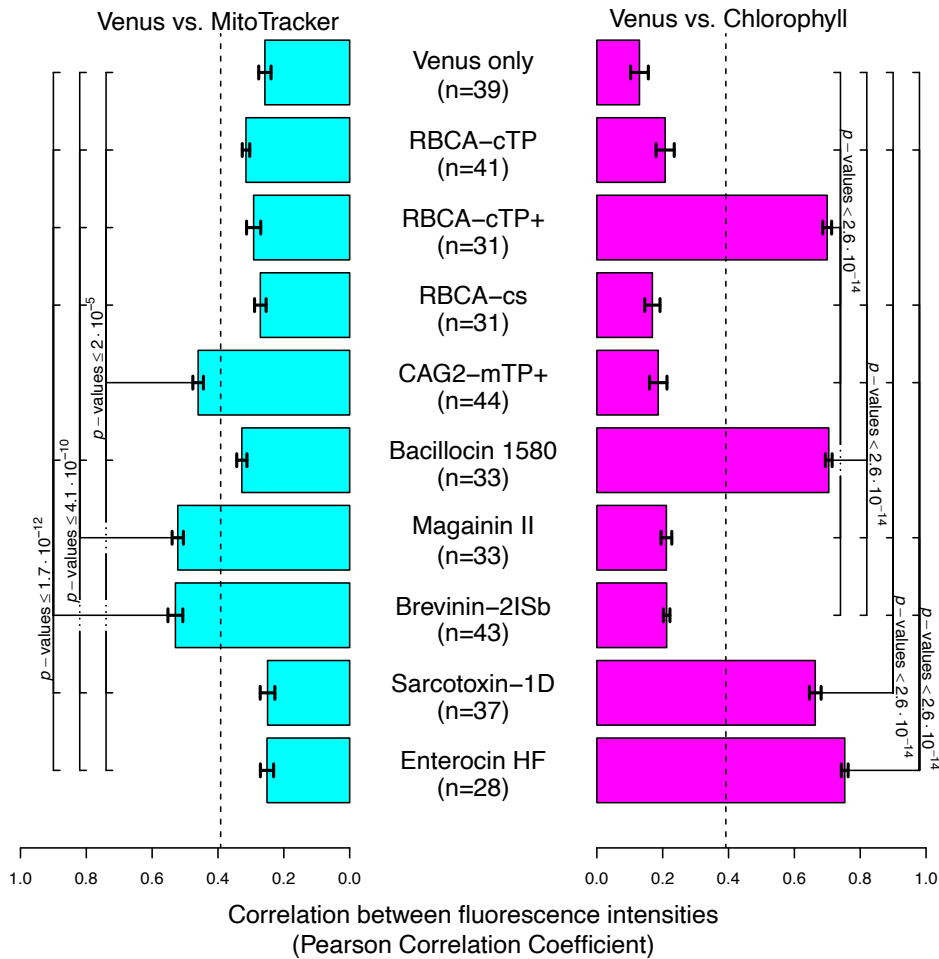

158  
 159 **Supplementary Figure 9. A quantitative assessment of co-localisation backs up targeting interpretations.**  
 160 Pearson correlation coefficients were calculated for each strain between the Venus channel and either the  
 161 MitoTracker or the chlorophyll channel of n cells were plotted as mean ± standard error. Perfect co-  
 162 localisation would give a value of 1, whereas 0 would indicate completely uncorrelated localisation. The  
 163 dashed line indicates the upper limit of a 95% confidence interval for PCCs between MitoTracker and  
 164 chlorophyll channels across all strains, which serves as a control for random co-localisation that arises  
 165 simply due to proximity of compartments within a cell. See Supplementary Figure 6 and Figure 5 for  
 166 description of constructs and exemplary images. The “no Venus” strain was excluded from this analysis, as  
 167 in the absence of Venus, Venus channel intensities within the cell are on the order of background values  
 168 subtracted from other strains (except for the eyespot). Significance was tested via a one-way ANOVA  
 169 followed by a Tukey post-hoc analysis. All p-values <0.05 from the Tukey analysis are indicated.

170  
 171

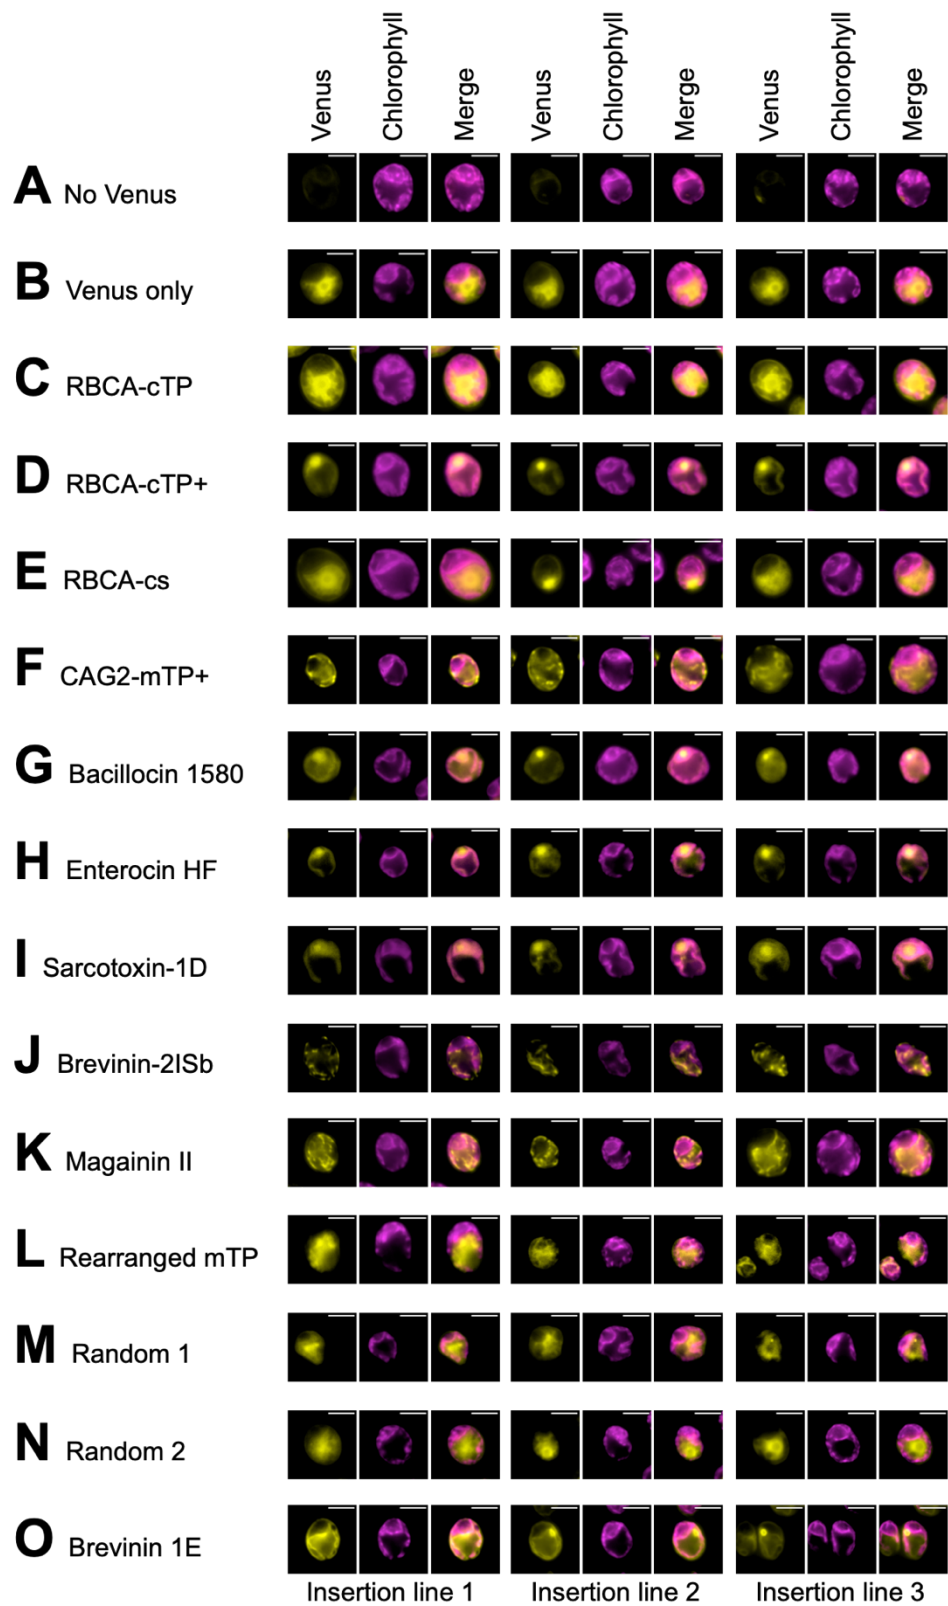

173 **Supplementary Figure 10. Three biological replicates all show the same phenotype for each construct.**

174 Epifluorescence false-colour images show representative cells from three independent insertion lines for

175 each construct. See Supplementary Figure 6 for a description of constructs (A) to (F), and Figure 5 for a

176 description of constructs (G) to (K) and Supplementary Figure 7 for a description of constructs (L) to (O).

177

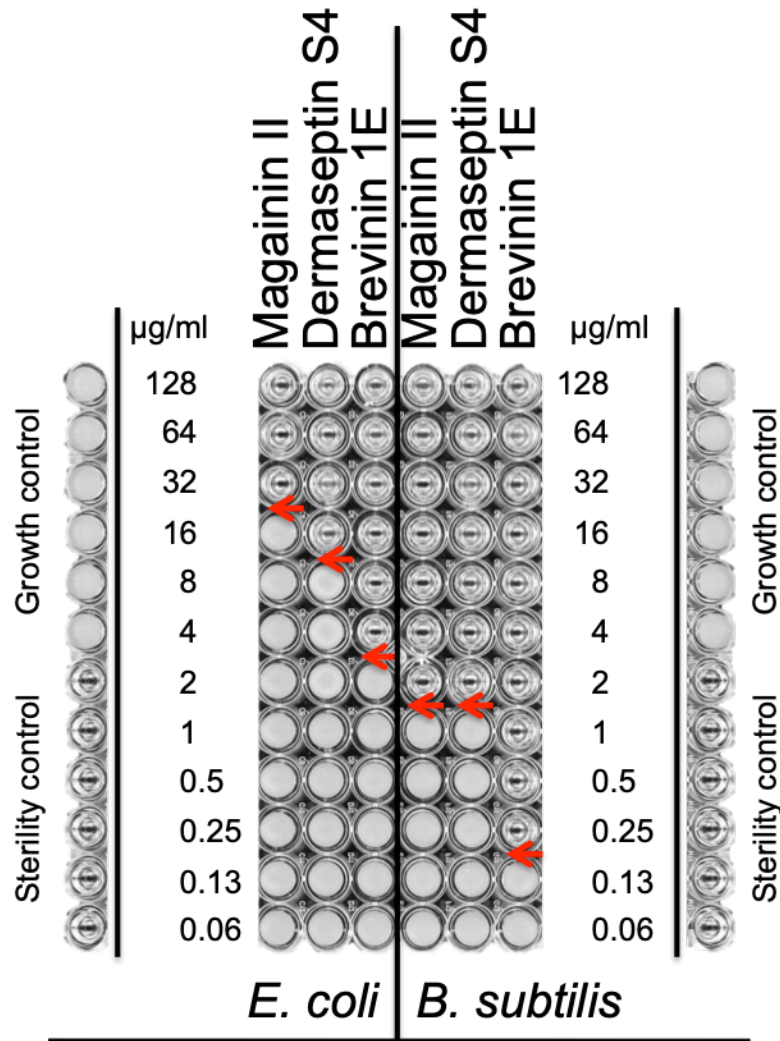

178  
 179 **Supplementary Figure 11. *B. subtilis* is a more sensitive probe for antimicrobial activity of peptides**  
 180 **than *E. coli*.** Gram negative *E. coli* and gram positive *B. subtilis* were challenged with serial dilutions of the  
 181 synthetic HA-RAMPs Magainin II, Dermaseptin S4 and Brevinin 1E (See Table S7 for sequences).  
 182 Transparent wells illustrate absence of growth. Red arrows point to the minimal peptide inhibiting  
 183 concentration. All wells shown here are part of the same 96-well plate; control rows are shown separately  
 184 on either side for improved clarity.

185  
 186  
 187
